# Supplementary material for: Expression of Transposable Elements in Neural Tissues during Xenopus Development
Source: PLoS One. 2011 Jul 26;6(7):e22569. doi: 10.1371/journal.pone.0022569 (PMC3144230; doi:10.1371/journal.pone.0022569)
Supplement: Table S2 — Primer and LNA sequences used in this study. (XLS) [file pone.0022569.s010.xls]

## Sheet: Sheet1
RT-PCR mRNAs
Gen/Transcript	Gene ID		Sequence (5' - 3')
Elongation factor 1 alpha (ef1-a)	NM_203970.2	Fw	ACTCAATCACCCAGGACAGATTAGTG
		Rv	GTGGGTAGTCTGAGAAGGTTTCTACA
Chordin (Chd)	NM_001016257.2	Fw	ACCCAGAGAGCCAGAGACAA
		Rv	ATCCACAGGGTCCACAGAAG
Sizzled (szl)	CR761702.2	Fw	CAGAAGGCCCAGTTGAGTTC
		Rv	TGATGGATGTCACCAGCAAT
Ornithine carboxylase (odc)	NM_001005441.1	Fw	GCACATGTCAAGCCAGTTCT
		Rv	TGCGCTCAGTTCTGGTACTT
Tc1-2_Xt primers	Sequence (5' - 3')
Primer A	CAGGTCCTTTTAAAAAAATTAGC
Primer B	ATATGCTAATTTTTTGAGATAGG
Primer C	GGTTCATTACTCAAAACCGC
Primer D	GCTTCCGCAGGTCCCCCAAGG
Primer E	ATGTCATTCGGAAATCAAGG
Primer F	TGGTGTTGGTCCACTGTGTT
Primer G	TATGGGGTTCAGGTCAGGAG
Primer H	ACTTGGTCGGGAATCCTTTT
Primer I	ATGATTGTGGCATACAGCTC
Primer J	CATGGCACCCCAGACCATCACTG
Primer K	CAGTGATGGTCTGGGGTGCCATG
Probe-cloning
Probe-Fw	TTGTGGAGAAGGACCGATTC
Probe-Rv	ACTTGGTCGGGAATCCTTTT
RACE 5' for sense strand
Primer M	GTTTCTACTCCAGACTCAGTCC
Primer N	CGCCTGTACACGGTGGCTCTGG
Primer D	GCTTCCGCAGGTCCCCCAAGG
Primer L	TCGGTCCTTCTCCACAATTT
Primer O	CCTCAGGAATCTTTTGCAGG
RACE 5' for antisense strand
Primer R	CCCGACCAAGTATTGAGTGC
RACE-PCR-inverted repeats (both strands)
Primer P	CATGAGCTGTATGCCACAATC
Primer Q	GGCTTGAACTACTTCAGTTGTG
RT-PCR Small RNAs
RTQ-UNIr	CGAATTCTAGAGCTCGAGGCAGG
RTQ	CGAATTCTAGAGCTCGAGGCAGGCGACATGGCTGGCTAGTTAAGCTTGGTACCGAGCTCGGATCCACTAGTCCTTTTTTTTTTTTTTTTTTTTTTTTTVN
Tc1-2_Xt-p845	TACTTGACACTGGACTTCAGGCATT
Tc1-2_Xt-p910	TGATAAAACACAGTGGACCAACA
piRNA control	GGAATACCAGGTGTTGTAGGCTA
LNA sequences (northern blots)
Tc1-2_Xt-p845-S	AATGCCTGAAGTCCAGTGTCAAGTA
Tc1-2_Xt-p845-AS	TACTTGACACTGGACTTCAGGCATT
Tc1-2_Xt-p910-AS	TGTTGGTCCACTGTGTTTTATCA
piRNA control	TAGCCTACAACACCTGGTATTCC
eagle	Fw	CATAAAGCCAGGGCAACAAT
	Rv	CAGCTGCCAGTCTTTTAGGG
froggy	Fw	AAAGCATGTGGGAAAAGGTG
	Rv	CCTGAAGGTTTTGTGCCAAT
jumpy	Fw	TCAGGGAGCATCAGTGTCAG
	Rv	CCTCATTCCGTTTTCGGTAA
maya	Fw	ACGCACAACCATTTCTAGGG
	Rv	GTGGGGTCTTCTGCTGTTGT
xeminos	Fw	AATCACAGAATGGGCTCAGG
	Rv	TTCGAATCGTGACTCGTCTG
Txr	Fw	GCCATCTGTTCGTCAACTCA
	Rv	TTGCGATAACTTGCAACGAG
in situ hibridization probes primers
Txr	Fw	TACATGGGCCTGTGTGAAAA
	Rv	CAGCCATTCAGAGGTGGATT
Txz	Fw	TTCCGCAGAAGACAACAGTG
	Rv	CTGTTTGTTTGTGGGCCTTT
	Table S2
